# Supplementary material for: Hsp90β inhibition upregulates interferon response and enhances immune checkpoint blockade therapy in murine tumors
Source: PubMed Central journal article supplement (PMC9630337; doi:10.3389/fimmu.2022.1005045), 2022-10-20
Supplement: DataSheet_1.pdf [file DataSheet_1.pdf]

## *Supplementary Material*

**Supplementary Table 1. Primer sequences used for qRT-PCR.**

| <b>Gene</b>                                           | <b>Abbreviation</b> | <b>Species</b> | <b>Sequence</b>                   | <b>Direction</b> |
|-------------------------------------------------------|---------------------|----------------|-----------------------------------|------------------|
| Abelson (P160) murine leukemia virus                  | AblMlv1             | Mouse          | TGT ACG AGG GCG TTT GGA AG        | F                |
| Abelson (P160) murine leukemia virus                  | AblMlv1             | Mouse          | GGG TAC ACA CCC CTA GCA G         | R                |
| Abelson (P160) murine leukemia virus                  | AblMlv2             | Mouse          | CTG GGA GAA AGC GAT GCA CT        | F                |
| Abelson (P160) murine leukemia virus                  | AblMlv2             | Mouse          | CGC TCA TCT TCA TTT AGG CTG C     | R                |
| Ecotropic murine leukemia virus                       | EcoMlv              | Mouse          | GTA ACG CCA TTT TGC AAG GC        | F                |
| Ecotropic murine leukemia virus                       | EcoMlv              | Mouse          | ATG AGG CTT GGG GTT GAT CC        | R                |
| Mus musculus mobilized endogenous polytropic provirus | EndoPP1             | Mouse          | GGC CGG AAC ACG AGT AAG AG        | F                |
| Mus musculus mobilized endogenous polytropic provirus | EndoPP1             | Mouse          | TTG GCC ACC GAC TGA CTT AC        | R                |
| Mus musculus mobilized endogenous polytropic provirus | EndoPP2             | Mouse          | TCT ATA GTC CCT GAG ACT GCC C     | F                |
| Mus musculus mobilized endogenous polytropic provirus | EndoPP2             | Mouse          | CAA CCA GCA CTC TTG GGT TTT<br>GT | R                |
| Murine leukemia virus                                 | Mlv                 | Mouse          | GTA CCA ACA GGG TGT GGA GG        | F                |

|                                                             |       |       |                            |   |
|-------------------------------------------------------------|-------|-------|----------------------------|---|
| Murine leukemia virus                                       | MLv   | Mouse | TTG ATG TCA CTG GAG ACC GC | R |
| Interferon-induced protein with tetratricopeptide repeats 1 | IFIT1 | Mouse | TCTGCTCTGCTGAAAACCCA       | F |
| Interferon-induced protein with tetratricopeptide repeats 1 | IFIT1 | Mouse | CACCATCAGCATTCTCTCCCAT     | R |
| Interferon-induced protein with tetratricopeptide repeats 2 | IFIT2 | Mouse | GTAGGGGTTACATCCGGCAC       | F |
| Interferon-induced protein with tetratricopeptide repeats 2 | IFIT2 | Mouse | TCTGTGCAGCACCTCTAAGTC      | R |
| Interferon-induced protein with tetratricopeptide repeats 3 | IFIT3 | Mouse | CTGAACTGCTCAGCCCACA        | F |
| Interferon-induced protein with tetratricopeptide repeats 3 | IFIT3 | Mouse | TTCCCGGTTGACCTCACTCA       | R |
| Interferon - $\beta$                                        | Ifnb1 | Mouse | ATCAACCTCACCTACAGGGC       | F |
| Interferon - $\beta$                                        | Ifnb1 | Mouse | ATCTCTTGGATGGCAAAGGCA      | R |
| Glyceraldehyde 3-phosphate dehydrogenase                    | GAPDH | Mouse | AGGTCGGTGTGAACGGATTTG      | F |
| Glyceraldehyde 3-phosphate dehydrogenase                    | GAPDH | Mouse | TGTAGACCATGTAGTTGAGGTCA    | R |

**Supplementary Table 2.** Antibodies used in western blot and flow cytometry.

| <b>Target</b>     | <b>Clone</b> | <b>Manufacturer</b> | <b>Cat#</b>   |
|-------------------|--------------|---------------------|---------------|
| HSP90             | AC88         | Enzo life sciences  | ADI-SPA-830   |
| Vinculin          | V284         | Millipore           | 05-386        |
| CDK4              | D9G3E        | CST                 | 12790         |
| $\alpha$ -Tubulin | DM1A         | Sigma-Aldrich       | T9026         |
| HSF-1             | 10H8         | Enzo Life Sciences  | ADI-SPA-950-D |
| IFIT1             | OTI3G8       | Origene             | TA500948S     |
| CD45              | UCHL1        | BD                  | 561888        |
| CD8a              | 53-6.7       | BD                  | 561095        |
| CD3 $\epsilon$    | 17A2         | Tonbo               | 65-0032       |
| CD11c             | N418         | Tonbo               | 50-0114       |
| MHC-II            | M5/114.15.2  | Tonbo               | 25-5321       |
| SRC               | 36D10        | CST                 | 2019          |
| CD8a              | D4W2Z        | CST                 | 98941         |
| Cleaved Caspase 3 | 269518       | CST                 | 9661          |
